# Supplementary material for: Transcriptome Profile Analysis of Winter Rapeseed (Brassica napus L.) in Response to Freezing Stress, Reveal Potentially Connected Events to Freezing Stress
Source: MDPI journal article supplement (doi:10.3390/ijms20112771), 2019-06-05
Supplement: s1 [file s1]

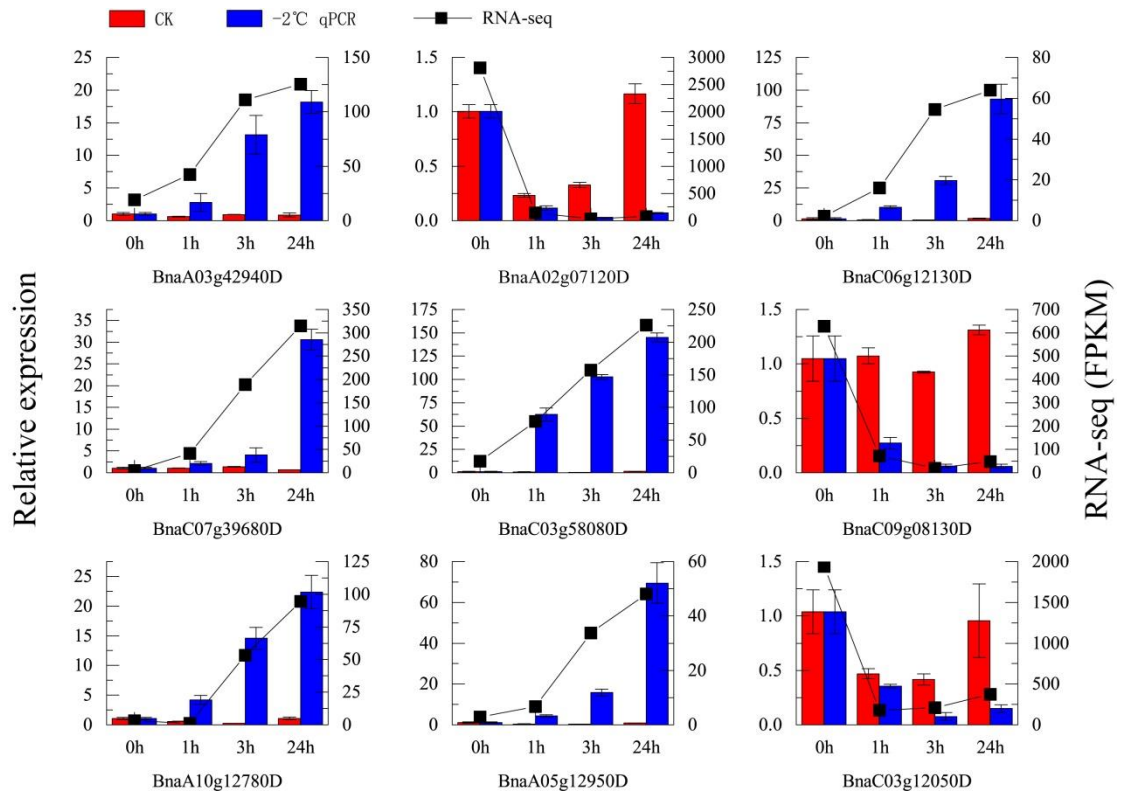

Figure S11 qRT-PCR analysis of selected DEG genes in *Brassica napus* of non-stressed (CK) and freezing-stressed (-2°C). Error bars represent standard errors of the relative expression levels mean values by qRT-PCR (n=4) (left y-axis). Point plot represent transcript levels change (log2 FC) according to the FPKM value of RNA-Seq (right y-axis).
